# Supplementary material for: Primary care for patients with respiratory tract infection before and early on in the COVID-19 pandemic: an observational study in 16 European countries
Source: HighWire-hosted journal article supplement (doi:10.1136/bmjopen-2021-049257), 2021-07-01
Supplement: bmjopen-2021-049257supp002_data_supplement.pdf [file bmjopen-2021-049257supp002_data_supplement.pdf]

Appendix 2: Consultation characteristics, use of PPE and measurements during face-to-face consultations, and diagnostic testing and referral for all contacts.

| Country              | Consultation at/via |                      | Use of PPE (F2F)         |                      | Measurements (F2F)   |                      | Diagnostic testing (all) |                      | Referral (all)         |
|----------------------|---------------------|----------------------|--------------------------|----------------------|----------------------|----------------------|--------------------------|----------------------|------------------------|
| <b>All countries</b> | <i>Practice</i>     | 38.3%<br>(36.6-40.0) | <i>Yes</i>               | 97.2%<br>(96.1-98.0) | <i>Temp</i>          | 70.2%<br>(67.6-72.7) | <i>Yes</i>               | 28.2%<br>(26.6-29.8) | 8.1%<br>(7.2-9.1)      |
|                      | <i>Telephone</i>    | 50.9%<br>(49.1-52.7) | <i>Apron/body</i>        | 52.0%<br>(49.2-54.8) | <i>O<sub>2</sub></i> | 68.3%<br>(65.7-70.8) | <i>CRP</i>               | 6.6%<br>(5.8-7.5)    | 15.4% #<br>(13.6-17.5) |
|                      | <i>Video/skype</i>  | 8.3%<br>(7.4-9.3)    | <i>Face, nose, mouth</i> | 96.1%<br>(94.9-97.0) | <i>RR</i>            | 51.2%<br>(48.4-54.0) | <i>COVID</i>             | 14.1%<br>(12.9-15.4) |                        |
|                      | <i>Home</i>         | 2.5%<br>(2.0-3.1)    | <i>Safety glasses</i>    | 57.0%<br>(54.3-59.8) |                      |                      | <i>WBC</i>               | 7.4%<br>(6.5-8.4)    |                        |
|                      |                     |                      | <i>Gloves</i>            | 67.1%<br>(64.5-69.7) |                      |                      | <i>X-ray</i>             | 8.9%<br>(8.0-10.0)   |                        |
| <b>Armenia</b>       | <i>Practice</i>     | 90.0%<br>(84.6-93.7) | <i>Yes</i>               | 98.7%<br>(95.4-99.6) | <i>Temp</i>          | 99.3%<br>(96.4-99.9) | <i>Yes</i>               | 38.8%<br>(31.8-46.3) | 12.9%<br>(8.7-18.8)    |
|                      | <i>Telephone</i>    | 10.0%<br>(6.3-15.4)  | <i>Apron/body</i>        | 7.8%<br>(4.5-13.2)   | <i>O<sub>2</sub></i> | 98.0%<br>(94.4-99.3) | <i>CRP</i>               | 14.1%<br>(9.7-20.1)  | 14.9% #<br>(9.5-22.6)  |
|                      | <i>Video/skype</i>  | 0.0%<br>(0.0-2.2)    | <i>Face, nose, mouth</i> | 98.0%<br>(94.4-99.3) | <i>RR</i>            | 32.0%<br>(25.2-39.8) | <i>COVID</i>             | 3.5%<br>(1.6-7.5)    |                        |
|                      | <i>Home</i>         | 0.0%<br>(0.0-2.2)    | <i>Safety glasses</i>    | 79.7%<br>(72.7-85.3) |                      |                      | <i>WBC</i>               | 11.8%<br>(7.8-17.5)  |                        |
|                      |                     |                      | <i>Gloves</i>            | 45.1%<br>(37.4-53.0) |                      |                      | <i>X-ray</i>             | 5.9%<br>(3.2-10.5)   |                        |
| <b>Belgium</b>       | <i>Practice</i>     | 25.6%<br>(20.1-31.7) | <i>Yes</i>               | 96.4%<br>(87.9-99.0) | <i>Temp</i>          | 37.5%<br>(26.0-50.6) | <i>Yes</i>               | 0.5%<br>(0.1-2.6)    | 8.3%<br>(5.3-12.8)     |
|                      | <i>Telephone</i>    | 74.0%<br>(67.9-79.5) | <i>Apron/body</i>        | 89.3%<br>(78.5-95.0) | <i>O<sub>2</sub></i> | 76.8%<br>(64.2-85.9) | <i>CRP</i>               | 0%<br>(0.0-1.8)      | 11% #<br>(6.9-17.1)    |
|                      | <i>Video/skype</i>  | 0.0%<br>(0.0-1.8)    | <i>Face, nose, mouth</i> | 96.4%<br>(87.9-99.0) | <i>RR</i>            | 8.9%<br>(3.9-19.3)   | <i>COVID</i>             | 0.5%<br>(0.1-2.6)    |                        |
|                      | <i>Home</i>         | 0.5%<br>(0.1-2.6)    | <i>Safety glasses</i>    | 89.3%<br>(78.5-95.0) |                      |                      | <i>WBC</i>               | 0%<br>(0.0-1.8)      |                        |
|                      |                     |                      | <i>Gloves</i>            | 91.1%<br>(80.7-96.1) |                      |                      | <i>X-ray</i>             | 0%<br>(0.0-1.8)      |                        |

|                |                    |                      |                          |                      |                      |                      |              |                      |                        |
|----------------|--------------------|----------------------|--------------------------|----------------------|----------------------|----------------------|--------------|----------------------|------------------------|
| <b>Germany</b> | <i>Practice</i>    | 79.4%<br>(73.0-84.5) | <i>Yes</i>               | 98.0%<br>(94.3-99.3) | <i>Temp</i>          | 15.9%<br>(10.9-22.6) | <i>Yes</i>   | 38.1%<br>(31.5-45.2) | 0.5%<br>(0.1-2.9)      |
|                | <i>Telephone</i>   | 14.8%<br>(10.5-20.6) | <i>Apron/body</i>        | 0.7%<br>(0.1-3.7)    | <i>O<sub>2</sub></i> | 4.0%<br>(1.8-8.4)    | <i>CRP</i>   | 14.3%<br>(10.0-20.0) | 0% #<br>(0.0-10.1)     |
|                | <i>Video/skype</i> | 5.3%<br>(2.9-9.5)    | <i>Face, nose, mouth</i> | 98.0%<br>(94.3-99.3) | <i>RR</i>            | 1.3%<br>(0.4-4.7)    | <i>COVID</i> | 31.2%<br>(25.0-38.1) |                        |
|                | <i>Home</i>        | 0.5%<br>(0.1-2.9)    | <i>Safety glasses</i>    | 0.7%<br>(0.1-3.7)    |                      |                      | <i>WBC</i>   | 2.1%<br>(0.8-5.3)    |                        |
|                |                    |                      | <i>Gloves</i>            | 2.0%<br>(0.7-5.7)    |                      |                      | <i>X-ray</i> | 0%<br>(0.0-2.0)      |                        |
| <b>Denmark</b> | <i>Practice</i>    | 8.9%<br>(5.6-14.9)   | <i>Yes</i>               | 46.2%<br>(21.4-67.4) | <i>Temp</i>          | 0.0%<br>(0.0-21.5)   | <i>Yes</i>   | 63.2%<br>(55.3-70.4) | 17.1%<br>(11.9-23.9)   |
|                | <i>Telephone</i>   | 72.6%<br>(64.8-78.9) | <i>Apron/body</i>        | 0.0%<br>(0.0-21.5)   | <i>O<sub>2</sub></i> | 0.0%<br>(0.0-21.5)   | <i>CRP</i>   | 4.6%<br>(2.3-9.2)    | 20.9% #<br>(14.4-29.4) |
|                | <i>Video/skype</i> | 18.5%<br>(13.1-25.3) | <i>Face, nose, mouth</i> | 46.2%<br>(21.4-67.4) | <i>RR</i>            | 38.5%<br>(16.3-61.2) | <i>COVID</i> | 59.2%<br>(51.3-66.7) |                        |
|                | <i>Home</i>        | 0.0%<br>(0.0-2.5)    | <i>Safety glasses</i>    | 0.0%<br>(0.0-21.5)   |                      |                      | <i>WBC</i>   | 2%<br>(0.7-5.6)      |                        |
|                |                    |                      | <i>Gloves</i>            | 46.2%<br>(21.4-67.4) |                      |                      | <i>X-ray</i> | 0.7%<br>(0.1-3.6)    |                        |
| <b>Spain</b>   | <i>Practice</i>    | 45.7%<br>(39.3-52.3) | <i>Yes</i>               | 100%<br>(96.4-100.0) | <i>Temp</i>          | 84.6%<br>(76.5-90.3) | <i>Yes</i>   | 35.9%<br>(29.9-42.4) | 10.8%<br>(7.3-15.5)    |
|                | <i>Telephone</i>   | 53.4%<br>(46.8-95.8) | <i>Apron/body</i>        | 99.0%<br>(94.8-99.8) | <i>O<sub>2</sub></i> | 96.2%<br>(90.5-98.5) | <i>CRP</i>   | 0%<br>(0.0-1.7)      | 12.2% #<br>(8.3-17.7)  |
|                | <i>Video/skype</i> | 0.0%<br>(0.0-1.7)    | <i>Face, nose, mouth</i> | 100%<br>(96.4-100.0) | <i>RR</i>            | 76.0%<br>(66.9-83.2) | <i>COVID</i> | 8.1%<br>(5.2-12.4)   |                        |
|                | <i>Home</i>        | 0.9%<br>(0.2-3.2)    | <i>Safety glasses</i>    | 95.2%<br>(89.2-97.9) |                      |                      | <i>WBC</i>   | 0.4%<br>(0.1-2.5)    |                        |
|                |                    |                      | <i>Gloves</i>            | 100%<br>(96.4-100.0) |                      |                      | <i>X-ray</i> | 30.9%<br>(25.2-37.3) |                        |

|                |                    |                      |                          |                      |                      |                      |              |                      |                        |
|----------------|--------------------|----------------------|--------------------------|----------------------|----------------------|----------------------|--------------|----------------------|------------------------|
| <b>France</b>  | <i>Practice</i>    | 41.3%<br>(33.8-49.2) | Yes                      | 98.6%<br>(92.6-99.8) | <i>Temp</i>          | 76.7%<br>(65.8-84.9) | Yes          | 29%<br>(22.5-36.6)   | 5.9%<br>(3.1-10.7)     |
|                | <i>Telephone</i>   | 10.3%<br>(6.5-16.1)  | <i>Apron/body</i>        | 42.5%<br>(31.8-53.9) | <i>O<sub>2</sub></i> | 83.6%<br>(73.4-90.3) | <i>CRP</i>   | 7.1%<br>(4.0-12.3)   | 8.5% #<br>(4.4-15.9)   |
|                | <i>Video/skype</i> | 42.6%<br>(35.1-50.5) | <i>Face, nose, mouth</i> | 97.3%<br>(90.5-99.2) | <i>RR</i>            | 26.0%<br>(17.3-37.1) | <i>COVID</i> | 16.1%<br>(11.2-22.7) |                        |
|                | <i>Home</i>        | 5.8%<br>(3.1-10.7)   | <i>Safety glasses</i>    | 47.9%<br>(36.9-59.2) |                      |                      | <i>WBC</i>   | 7.7%<br>(4.5-13.0)   |                        |
|                |                    |                      | <i>Gloves</i>            | 20.5%<br>(12.9-31.2) |                      |                      | <i>X-ray</i> | 0.6%<br>(0.1-3.6)    |                        |
| <b>Georgia</b> | <i>Practice</i>    | 63.1%<br>(56.5-69.1) | Yes                      | 99.3%<br>(96.1-99.9) | <i>Temp</i>          | 80.3%<br>(73.0-86.0) | Yes          | 35.6%<br>(29.6-42.1) | 1.8%<br>(0.7-4.5)      |
|                | <i>Telephone</i>   | 35.1%<br>(29.2-41.6) | <i>Apron/body</i>        | 16.9%<br>(11.6-23.9) | <i>O<sub>2</sub></i> | 88.0%<br>(81.7-92.4) | <i>CRP</i>   | 13.1%<br>(9.3-18.1)  | 11.1% #<br>(2.0-43.5)  |
|                | <i>Video/skype</i> | 0.9%<br>(0.2-3.2)    | <i>Face, nose, mouth</i> | 94.4%<br>(89.3-97.1) | <i>RR</i>            | 93.7%<br>(88.4-96.6) | <i>COVID</i> | 2.3%<br>(1.0-5.2)    |                        |
|                | <i>Home</i>        | 0.9%<br>(0.2-3.2)    | <i>Safety glasses</i>    | 16.9%<br>(11.6-23.9) |                      |                      | <i>WBC</i>   | 14.4%<br>(10.4-19.6) |                        |
|                |                    |                      | <i>Gloves</i>            | 69.0%<br>(61.0-76.0) |                      |                      | <i>X-ray</i> | 18.9%<br>(14.3-24.6) |                        |
| <b>Greece</b>  | <i>Practice</i>    | 37.1%<br>(31.0-43.6) | Yes                      | 99.0%<br>(94.4-99.8) | <i>Temp</i>          | 90.7%<br>(83.3-95.0) | Yes          | 24.9%<br>(19.6-31.0) | 14.9%<br>(10.8-20.2)   |
|                | <i>Telephone</i>   | 54.3%<br>(47.7-60.7) | <i>Apron/body</i>        | 58.8%<br>(48.8-68.0) | <i>O<sub>2</sub></i> | 96.9%<br>(91.3-98.9) | <i>CRP</i>   | 11.8%<br>(8.2-16.7)  | 25.3% #<br>(17.2-35.6) |
|                | <i>Video/skype</i> | 1.8%<br>(0.7-4.6)    | <i>Face, nose, mouth</i> | 97.9%<br>(92.8-99.4) | <i>RR</i>            | 87.6%<br>(79.6-92.8) | <i>COVID</i> | 1.4%<br>(0.5-3.9)    |                        |
|                | <i>Home</i>        | 6.8%<br>(4.2-10.9)   | <i>Safety glasses</i>    | 61.9%<br>(51.9-70.9) |                      |                      | <i>WBC</i>   | 11.3%<br>(7.8-16.2)  |                        |
|                |                    |                      | <i>Gloves</i>            | 92.8%<br>(85.8-96.5) |                      |                      | <i>X-ray</i> | 24.4%<br>(19.2-30.5) |                        |

|                |                    |                      |                          |                      |                      |                      |              |                      |                        |
|----------------|--------------------|----------------------|--------------------------|----------------------|----------------------|----------------------|--------------|----------------------|------------------------|
| <b>Hungary</b> | <i>Practice</i>    | 29.7%<br>(22.7-37.8) | Yes                      | 100%<br>(91.6-100)   | <i>Temp</i>          | 26.2%<br>(15.3-41.1) | Yes          | 19.6%<br>(13.8-27.0) | 1.4%<br>(0.4-5.1)      |
|                | <i>Telephone</i>   | 69.6%<br>(61.4-76.6) | <i>Apron/body</i>        | 92.9%<br>(81.0-97.5) | <i>O<sub>2</sub></i> | 0.0%<br>(0.0-8.4)    | <i>CRP</i>   | 8.7%<br>(5.0-14.6)   | 11.1% #<br>(3.1-32.8)  |
|                | <i>Video/skype</i> | 0.0%<br>(0.0-2.7)    | <i>Face, nose, mouth</i> | 95.2%<br>(84.2-98.7) | <i>RR</i>            | 9.5%<br>(3.8-22.1)   | <i>COVID</i> | 7.2%<br>(4.0-12.8)   |                        |
|                | <i>Home</i>        | 0.7%<br>(0.1-4.0)    | <i>Safety glasses</i>    | 33.3%<br>(21.0-48.4) |                      |                      | <i>WBC</i>   | 0%<br>(0.0-2.7)      |                        |
|                |                    |                      | <i>Gloves</i>            | 95.2%<br>(84.2-98.7) |                      |                      | <i>X-ray</i> | 5.8%<br>(3.0-11.0)   |                        |
| <b>Ireland</b> | <i>Practice</i>    | 16.2%<br>(11.8-21.6) | Yes                      | 89.2%<br>(75.3-95.7) | <i>Temp</i>          | 75.7%<br>(59.9-86.6) | Yes          | 9.2%<br>(6.0-13.8)   | 2.3%<br>(1.0-5.3)      |
|                | <i>Telephone</i>   | 77.3%<br>(71.4-82.5) | <i>Apron/body</i>        | 73.0%<br>(57.0-84.6) | <i>O<sub>2</sub></i> | 56.8%<br>(40.9-71.3) | <i>CRP</i>   | 0.5%<br>(0.1-2.6)    | 1.2% #<br>(0.2-6.4)    |
|                | <i>Video/skype</i> | 5.6%<br>(3.2-9.4)    | <i>Face, nose, mouth</i> | 86.5%<br>(72.0-94.1) | <i>RR</i>            | 64.9%<br>(48.8-78.2) | <i>COVID</i> | 8.3%<br>(5.3-12.7)   |                        |
|                | <i>Home</i>        | 0.9%<br>(0.3-3.3)    | <i>Safety glasses</i>    | 54.1%<br>(38.4-69.0) |                      |                      | <i>WBC</i>   | 0.5%<br>(0.1-2.6)    |                        |
|                |                    |                      | <i>Gloves</i>            | 70.3%<br>(54.2-82.5) |                      |                      | <i>X-ray</i> | 0%<br>(0.0-1.7)      |                        |
| <b>Moldova</b> | <i>Practice</i>    | 24.4%<br>(19.4-30.2) | Yes                      | 98.3%<br>(91.1-99.7) | <i>Temp</i>          | 95.0%<br>(86.3-98.3) | Yes          | 66.4%<br>(60.2-72.1) | 17.2%<br>(13.0-22.5)   |
|                | <i>Telephone</i>   | 34.9%<br>(29.1-41.1) | <i>Apron/body</i>        | 96.7%<br>(88.6-99.1) | <i>O<sub>2</sub></i> | 98.3%<br>(91.1-99.7) | <i>CRP</i>   | 8.8%<br>(5.8-13.1)   | 28.6% #<br>(21.7-36.5) |
|                | <i>Video/skype</i> | 39.9%<br>(33.9-46.3) | <i>Face, nose, mouth</i> | 98.3%<br>(91.1-99.7) | <i>RR</i>            | 98.3%<br>(91.1-99.7) | <i>COVID</i> | 54.2%<br>(47.9-60.4) |                        |
|                | <i>Home</i>        | 0.8%<br>(0.2-3.0)    | <i>Safety glasses</i>    | 98.3%<br>(91.1-99.7) |                      |                      | <i>WBC</i>   | 27.3%<br>(22.0-33.3) |                        |
|                |                    |                      | <i>Gloves</i>            | 98.3%<br>(91.1-99.7) |                      |                      | <i>X-ray</i> | 15.1%<br>(11.1-20.2) |                        |

|                    |                    |                      |                          |                      |                      |                      |              |                      |                        |
|--------------------|--------------------|----------------------|--------------------------|----------------------|----------------------|----------------------|--------------|----------------------|------------------------|
| <b>Netherlands</b> | <i>Practice</i>    | 17.0%<br>(12.7-22.3) | Yes                      | 89.8%<br>(79.5-95.3) | <i>Temp</i>          | 76.3%<br>(64.0-85.3) | Yes          | 9.6%<br>(6.4-14.1)   | 5.7%<br>(3.3-9.4)      |
|                    | <i>Telephone</i>   | 72.1%<br>(66.1-77.6) | <i>Apron/body</i>        | 84.7%<br>(73.5-91.8) | <i>O<sub>2</sub></i> | 86.4%<br>(75.5-93.0) | <i>CRP</i>   | 6.1%<br>(3.7-10.0)   | 8.1% #<br>(4.6-14.0)   |
|                    | <i>Video/skype</i> | 2.2%<br>(0.9-5.0)    | <i>Face, nose, mouth</i> | 88.1%<br>(77.5-94.1) | <i>RR</i>            | 57.6%<br>(44.9-69.4) | <i>COVID</i> | 3.5%<br>(1.8-6.7)    |                        |
|                    | <i>Home</i>        | 8.7%<br>(5.7-13.0)   | <i>Safety glasses</i>    | 86.4%<br>(75.5-93.0) |                      |                      | <i>WBC</i>   | 0%<br>(0.0-1.6)      |                        |
|                    |                    |                      | <i>Gloves</i>            | 89.8%<br>(79.5-95.3) |                      |                      | <i>X-ray</i> | 0%<br>(0.0-1.6)      |                        |
| <b>Poland</b>      | <i>Practice</i>    | 38.3%<br>(32.2-44.7) | Yes                      | 96.7%<br>(90.8-98.9) | <i>Temp</i>          | 58.2%<br>(48.0-67.8) | Yes          | 13%<br>(9.3-18.0)    | 3.5%<br>(1.8-6.7)      |
|                    | <i>Telephone</i>   | 59.6%<br>(53.1-65.7) | <i>Apron/body</i>        | 92.3%<br>(85.0-96.2) | <i>O<sub>2</sub></i> | 25.3%<br>(17.5-35.1) | <i>CRP</i>   | 5.2%<br>(3.0-8.9)    | 38.5% #<br>(17.7-64.5) |
|                    | <i>Video/skype</i> | 0.9%<br>(0.2-3.1)    | <i>Face, nose, mouth</i> | 96.7%<br>(90.8-98.9) | <i>RR</i>            | 23.1%<br>(15.6-32.7) | <i>COVID</i> | 3.9%<br>(2.1-7.3)    |                        |
|                    | <i>Home</i>        | 1.3%<br>(0.4-3.8)    | <i>Safety glasses</i>    | 51.6%<br>(41.5-61.6) |                      |                      | <i>WBC</i>   | 4.8%<br>(2.7-8.4)    |                        |
|                    |                    |                      | <i>Gloves</i>            | 87.9%<br>(79.6-93.1) |                      |                      | <i>X-ray</i> | 4.3%<br>(2.4-7.8)    |                        |
| <b>Romania</b>     | <i>Practice</i>    | 27.2%<br>(19.9-36.0) | Yes                      | 96.8%<br>(83.8-99.4) | <i>Temp</i>          | 71.0%<br>(53.4-83.9) | Yes          | 21.1%<br>(14.6-29.4) | 7.9%<br>(4.2-14.3)     |
|                    | <i>Telephone</i>   | 64.9%<br>(55.8-73.1) | <i>Apron/body</i>        | 48.4%<br>(32.0-65.2) | <i>O<sub>2</sub></i> | 35.5%<br>(21.1-53.1) | <i>CRP</i>   | 9.6%<br>(5.5-16.5)   | 75% #<br>(40.9-92.9)   |
|                    | <i>Video/skype</i> | 7.9%<br>(4.2-14.3)   | <i>Face, nose, mouth</i> | 96.8%<br>(83.8-99.4) | <i>RR</i>            | 32.3%<br>(18.6-49.9) | <i>COVID</i> | 5.3%<br>(2.4-11.0)   |                        |
|                    | <i>Home</i>        | 0.0%<br>(0.0-3.3)    | <i>Safety glasses</i>    | 61.3%<br>(43.8-76.3) |                      |                      | <i>WBC</i>   | 9.6%<br>(5.5-16.5)   |                        |
|                    |                    |                      | <i>Gloves</i>            | 87.1%<br>(71.1-94.9) |                      |                      | <i>X-ray</i> | 10.5%<br>(6.1-17.5)  |                        |

|                       |                    |                      |                          |                      |                      |                      |              |                      |                        |
|-----------------------|--------------------|----------------------|--------------------------|----------------------|----------------------|----------------------|--------------|----------------------|------------------------|
| <b>Ukraine</b>        | <i>Practice</i>    | 39.9%<br>(33.8-46.4) | <i>Yes</i>               | 97.2%<br>(92.1-99.0) | <i>Temp</i>          | 86.0%<br>(78.2-91.3) | <i>Yes</i>   | 31.1%<br>(25.5-37.4) | 9.6%<br>(6.5-14.2)     |
|                       | <i>Telephone</i>   | 46.1%<br>(39.7-52.5) | <i>Apron/body</i>        | 63.6%<br>(54.1-72.1) | <i>O<sub>2</sub></i> | 75.7%<br>(66.8-82.8) | <i>CRP</i>   | 3.1%<br>(1.5-6.2)    | 25.0% #<br>(16.2-36.4) |
|                       | <i>Video/skype</i> | 7.0%<br>(4.4-11.1)   | <i>Face, nose, mouth</i> | 97.2%<br>(92.1-99.0) | <i>RR</i>            | 81.3%<br>(72.9-87.6) | <i>COVID</i> | 15.3%<br>(11.2-20.6) |                        |
|                       | <i>Home</i>        | 7.0%<br>(4.4-11.1)   | <i>Safety glasses</i>    | 80.4%<br>(71.9-86.8) |                      |                      | <i>WBC</i>   | 17.5%<br>(13.2-23.0) |                        |
|                       |                    |                      | <i>Gloves</i>            | 84.1%<br>(76.0-89.8) |                      |                      | <i>X-ray</i> | 10.5%<br>(7.2-15.2)  |                        |
| <b>United Kingdom</b> | <i>Practice</i>    | 21.8%<br>(15.2-29.9) | <i>Yes</i>               | 100%<br>(88.3-100.0) | <i>Temp</i>          | 79.3%<br>(61.6-90.2) | <i>Yes</i>   | 15%<br>(9.7-22.5)    | 9.2%<br>(5.2-15.7)     |
|                       | <i>Telephone</i>   | 70.6%<br>(62.2-78.2) | <i>Apron/body</i>        | 100%<br>(88.3-100.0) | <i>O<sub>2</sub></i> | 86.2%<br>(69.4-94.5) | <i>CRP</i>   | 0.8%<br>(0.1-4.6)    | 16.7% #<br>(9.3-28.0)  |
|                       | <i>Video/skype</i> | 5.0%<br>(2.3-10.5)   | <i>Face, nose, mouth</i> | 88.3-100.0           | <i>RR</i>            | 75.9%<br>(57.9-87.8) | <i>COVID</i> | 8.3%<br>(4.6-14.7)   |                        |
|                       | <i>Home</i>        | 2.5%<br>(0.9-7.1)    | <i>Safety glasses</i>    | 100%<br>(88.3-100.0) |                      |                      | <i>WBC</i>   | 2.5%<br>(0.9-7.1)    |                        |
|                       |                    |                      | <i>Gloves</i>            | 79.3%<br>(61.6-90.2) |                      |                      | <i>X-ray</i> | 5.8%<br>(2.9-11.6)   |                        |
|                       |                    |                      |                          | 82.8%<br>(65.5-92.4) |                      |                      |              |                      |                        |

# COVID-19 suspected patients, note that per country this can be a low number.
